# Supplementary material
Source: PubMed Central journal article supplement (PMC3050870)
Supplement: neo1303_0276SD1.pdf [file neo1303_0276SD1.pdf]

**Table W1.** Primer Pairs of TGF- $\beta$  Superfamily Signaling Molecules.

|                                 | Sequence                                                                                | Annealing Temperature (°C) | Extension Time | Cycles | Amplicon Size (bp) | Reference                                           |
|---------------------------------|-----------------------------------------------------------------------------------------|----------------------------|----------------|--------|--------------------|-----------------------------------------------------|
| <i>BMP-7</i>                    | For 3' CACGCTACCACCATCGAGAG 5'<br>Rev 3' TTCATGTAGGAGTTCAGAGGGA 5'                      | 58                         | 41 sec         | 35     | 669                | PerlPrimer v1.1.10 Software                         |
| <i>Alk-2</i>                    | For 3' CTCCGAGTACCCCACTGA 5'<br>Rev 3' CTGTGTTCAGGGAAGGA 5'                             | 55                         | 30 sec         | 35     | 457                | PerlPrimer v1.1.10 Software                         |
| <i>Alk-3</i>                    | For 3' CAGAATCTGGATAGTATGCTTCATGGC 5'<br>Rev 3' GACAGCCATAGAAATGAGCAAACCAGC 5'          | 60                         | 30 sec         | 35     | 418                | PerlPrimer v1.1.10 Software                         |
| <i>Alk-6</i>                    | For 3' TGCGAAGTGCAGAAAAAT 5'<br>Rev 3' GGGATTCTCCAGGAGGAA 5'                            | 55                         | 30 sec         | 35     | 502                | PerlPrimer v1.1.10 Software                         |
| <i>BMPRII</i>                   | For 3' CATTGGAGATCCCCAAGA 5'<br>Rev 3' ATATCGACCTCGGCCAAT 5'                            | 50                         | 30 sec         | 35     | 382                | PerlPrimer v1.1.10 Software                         |
| <i>ActrIIA</i>                  | For 3' CTTCAAATCCAGTTACACCT 5'<br>Rev 3' CAGTTCATTCCAAGAGACCA 5'                        | 53                         | 30 sec         | 35     | 490                | PerlPrimer v1.1.10 Software                         |
| <i>ActrIIB</i>                  | For 3' GATGACTTCAACTGCTACGA 5'<br>Rev 3' ATGTGATGATGTTCCCTTGAG 5'                       | 55                         | 37 sec         | 35     | 612                | PerlPrimer v1.1.10 Software                         |
| <i>SMAD-1</i>                   | For 3' CATCAATCCCTACCACTATAAGAG 5'<br>Rev 3' GAAACCATCCACCAACACAC 5'                    | 56                         | 40 sec         | 35     | 534                | PerlPrimer v1.1.10 Software                         |
| <i>SMAD-5</i>                   | For 3' TCAACCCATAACCACTATAAGAG 5'<br>Rev 3' CTCATATACTGCCTCAAACCC 5'                    | 55                         | 1 min          | 35     | 847                | PerlPrimer v1.1.10 Software                         |
| <i>SMAD-8</i>                   | For 3' CTCCCTCTTCTCCTTCACCA 5'<br>Rev 3' CACCCTTTCCATATATGCTCCT 5'                      | 57                         | 1 min          | 35     | 871                | PerlPrimer v1.1.10 Software                         |
| <i>SMAD-4</i>                   | For 3' TCAATTCAAACCATCCAGCA 5'<br>Rev 3' GACCCAAACATCACCTTCAC 5'                        | 56                         | 40 sec         | 35     | 665                | PerlPrimer v1.1.10 Software                         |
| <i>TGF-<math>\beta</math>1</i>  | For 3' TGGCGATACCTCAGCAACC 5'<br>Rev 3' CTCGTGGATCCACTTCCAG 5'                          | 59                         | 25 sec         | 35     | 405                | <i>Int J Cancer</i> 2000;89:251–258                 |
| <i>TGF-<math>\beta</math>2</i>  | For 3' ATCCGCCCCACTTCTACAGAC 5'<br>Rev 3' CATCCAAAGCACGCTTCTTCC 5'                      | 61                         | 35 sec         | 35     | 565                | <i>Int J Cancer</i> 2000;89:251–258                 |
| <i>TGF-<math>\beta</math>3</i>  | For 3' TACTATGCCAACTTCTGCTC 5'<br>Rev 3' AACTTACCATCCCTTCCCTC 5'                        | 55                         | 32 sec         | 35     | 522                | <i>Int J Cancer</i> 2000;89:251–258                 |
| <i>Alk-5</i>                    | For 3' ACGGCGTTACAGTGTCTTG 5'<br>Rev 3' GGTTGTGGCAGATATAGACC 5'                         | 57                         | 22 sec         | 35     | 358                | <i>Int J Cancer</i> 2000;89:251–258                 |
| <i>Alk-1</i>                    | For 3' CTCAGACACGACAACATCCT 5'<br>Rev 3' TATAGTCCCTCCACGATGCCA 5'                       | 57                         | 31 sec         | 35     | 513                | PerlPrimer v1.1.10 Software                         |
| <i>T<math>\beta</math>-RII</i>  | For 3' AGCAACTGCAGCATCACCTC 5'<br>Rev 3' TGATGTCTGAGAAGATGTCC 5'                        | 58                         | 42 sec         | 35     | 688                | <i>Int J Cancer</i> 2000;89:251–258                 |
| <i>SMAD-2</i>                   | For 3' ATCCTAACAGAACTTCCGCC 5'<br>Rev 3' CTCAGCAAAAACCTTCCCCAC 5'                       | 57                         | 31 sec         | 35     | 489                | <i>Int J Cancer</i> 2000;89:251–258                 |
| <i>SMAD-3</i>                   | For 3' AGAAGACGGGGCAGCTGGAC 5'<br>Rev 3' GACATCGGATTCGGGGATAG 5'                        | 57                         | 31 sec         | 35     | 511                | <i>Int J Cancer</i> 2000;89:251–258                 |
| <i>SMAD-6</i>                   | For 3' TGAATTCTCAGACGCCAGCA 5'<br>Rev 3' GCTCGAAGTCAACACCTT 5'                          | 55                         | 30 sec         | 40     | 386                | <i>Biochem Biophys Res Commun</i> 2001;287(1):47–55 |
| <i>SMAD-7</i>                   | For 3' GCCCTCTCTGGATATCTTCT 5'<br>Rev 3' GCTGCATAAACTCGTGGTCA 5'                        | 55                         | 30 sec         | 35     | 320                | <i>Biochem Biophys Res Commun</i> 2001;287(1):47–55 |
| <i><math>\beta</math>-actin</i> | For 3' ATCTGGCACCACACCTTCTACAATGAGCTGCG 5'<br>Rev 3' CGTCATACTCTGCTTGCTGATCCACATCTGC 5' | 67                         | 1 min          | 25     | 838                | PerlPrimer v1.1.10 Software                         |

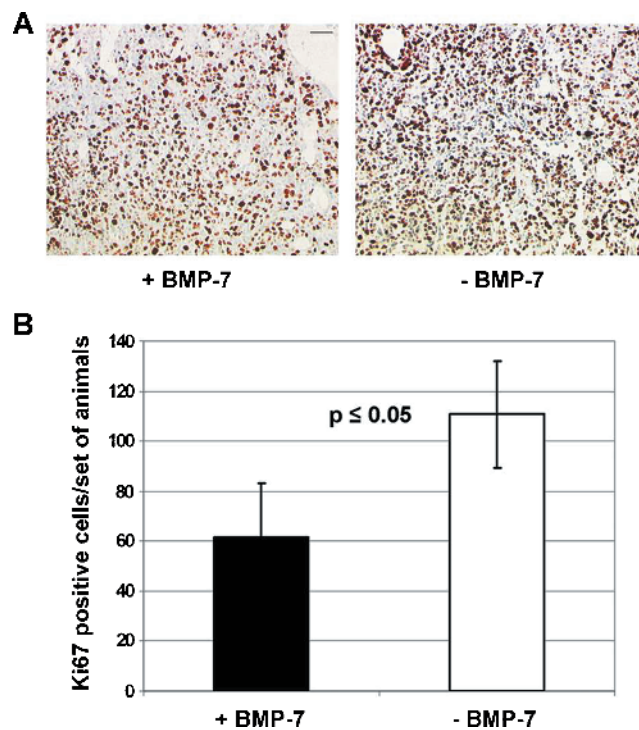

**Figure W1.** Immunohistochemical analysis of Ki67 in experimental gliomas. Mice brains were dissected 10 days after starting BMP-7 (100  $\mu\text{g}/\text{kg}$  per day) or control buffer treatment ( $\pm$  BMP-7). Sections (4  $\mu\text{m}$ ) of paraffin-embedded tissue were subjected to immunohistochemical analysis of Ki67 expression. (A) Representative images of mice brain sections are presented at 200 $\times$  magnification (bars = 50  $\mu\text{m}$ ). (B) Ki67-positive cells were counted per visual field (VF); means were calculated and plotted per set of animal ( $n = 3$ ,  $P \leq .05$ ).

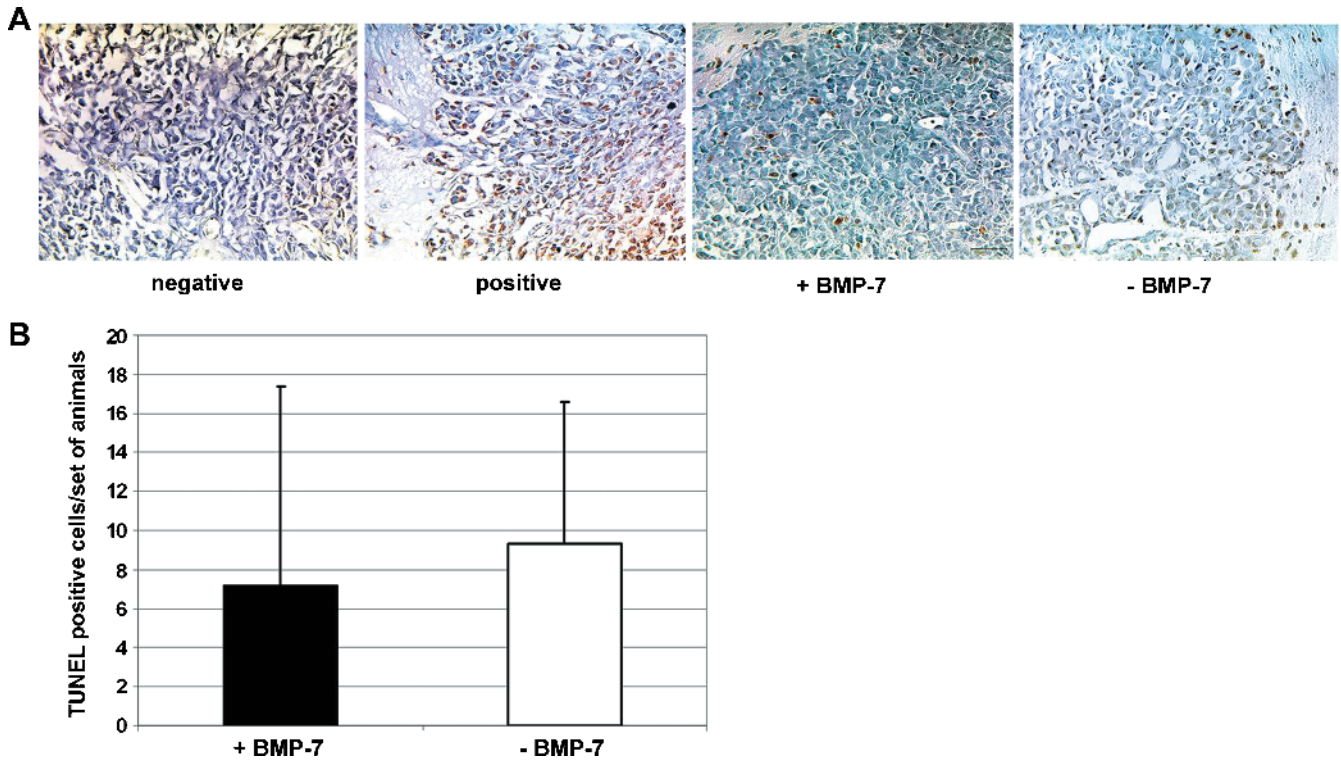

**Figure W2.** TUNEL analysis in experimental gliomas. Mice brains were dissected 10 days after starting BMP-7 (100  $\mu\text{g}/\text{kg}$  per day) or control buffer treatment ( $\pm$  BMP-7). Sections (4  $\mu\text{m}$ ) of paraffin-embedded tissue were subjected to immunohistochemical analysis of TUNEL-positive cells. (A) Representative images of mice brain sections are presented at 200 $\times$  magnification (bars = 50  $\mu\text{m}$ ). Negative and positive control sections (DNase I-treated) are included. (B) TUNEL-positive cells were counted per visual field (VF); means were calculated and plotted per set of animals ( $n = 3$ ,  $P = .78$ ).

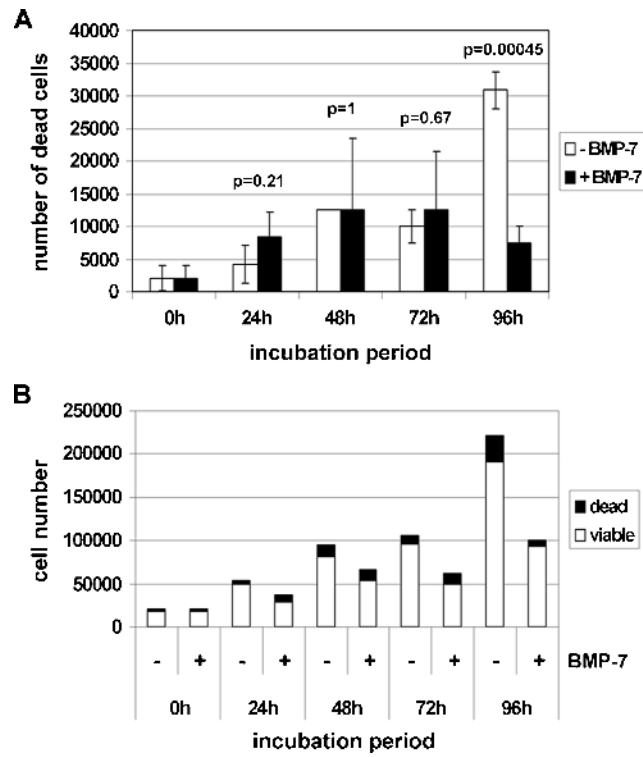

**Figure W3.** Numbers of viable and dead cells in the presence or absence of BMP-7. Viable and dead cells were monitored after Trypan blue exclusion and counted at several time points before (0 hour) and after (24, 48, 72, and 96 hours) BMP-7 (500 ng/ml) or control buffer treatment. All values are presented as the mean  $\pm$  SD of three independent experiments. *P* values are depicted in the figure. (A) Numbers of dead cells in the absence or presence of BMP-7. (B) Fractions of viable and dead cells in the presence or absence of BMP-7.

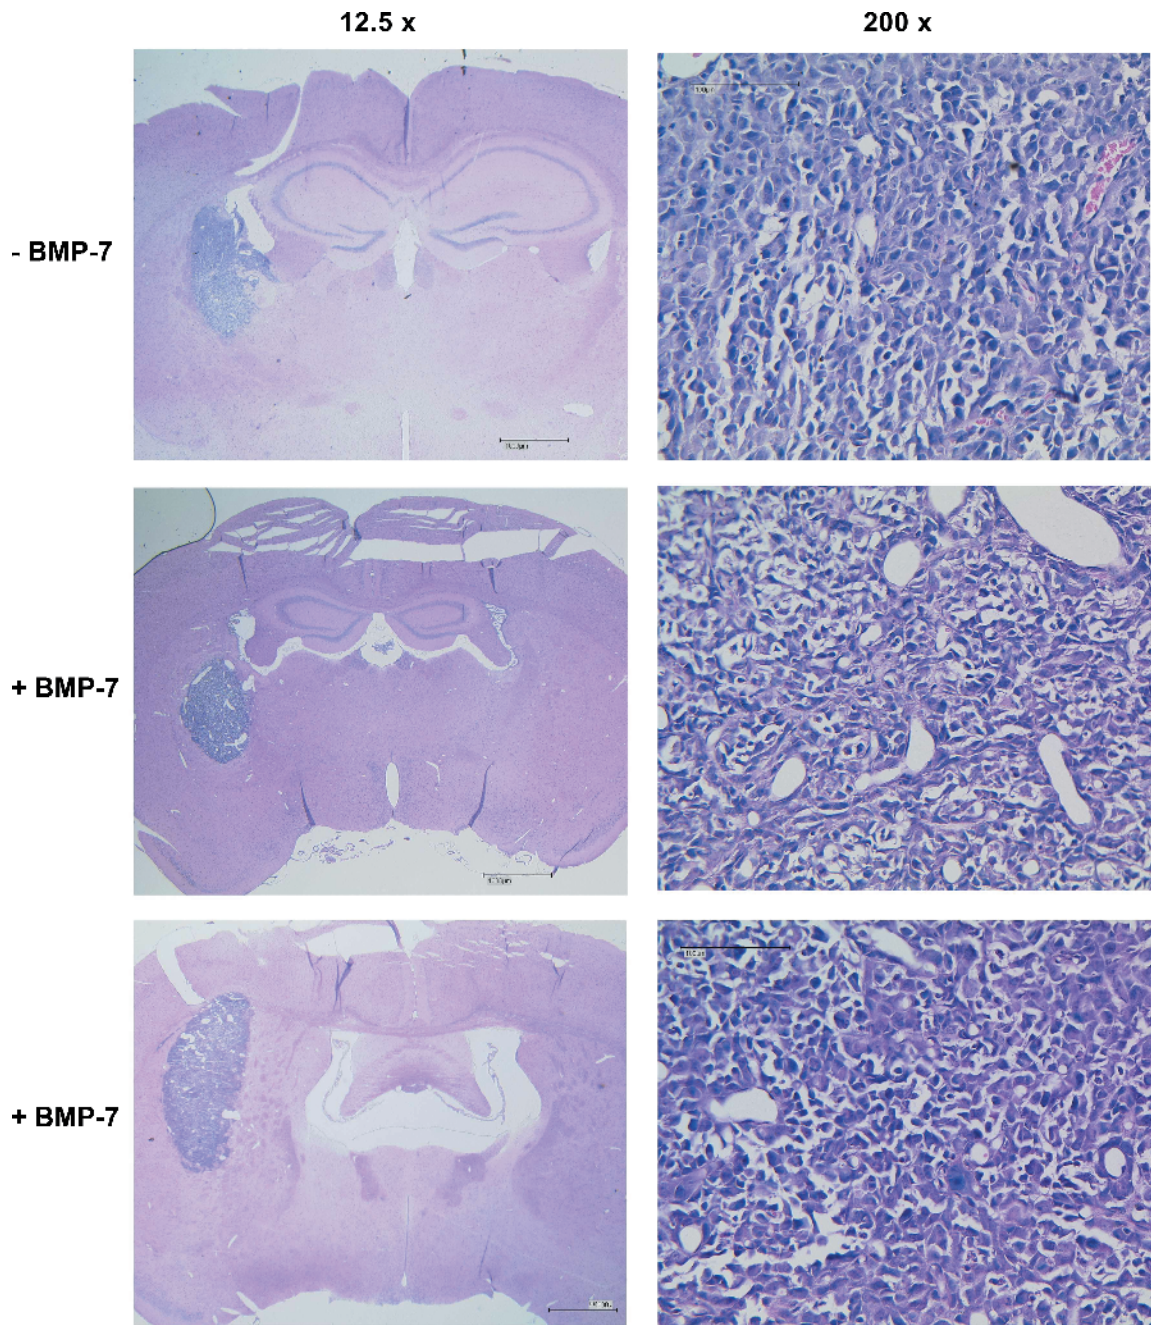

**Figure W4.** Hematoxylin and eosin staining of experimental gliomas. Mice brains were dissected 10 days after starting BMP-7 (100  $\mu\text{g}/\text{kg}$  per day) or control buffer treatment ( $\pm$  BMP-7). Sections (4  $\mu\text{m}$ ) of paraffin-embedded tissue were subjected to hematoxylin and eosin staining. Representative images of mice brain sections are presented at 12.5 $\times$  and 200 $\times$  magnifications (bars = 1000  $\mu\text{m}$  and 100  $\mu\text{m}$ , respectively).
